# Supplementary material for: Genetic Diversity and Population Structure of Maize Inbred Lines with Varying Levels of Resistance to Striga hermonthica Using Agronomic Trait-Based and SNP Markers
Source: MDPI journal article supplement (doi:10.3390/plants9091223), 2020-09-17

**Supplementary Table S1.** Traits measured, their description and unit

| S/N | Traits                        | Traits Abb.  | Trait description                                                                                                                                                        | Unit  |
|-----|-------------------------------|--------------|--------------------------------------------------------------------------------------------------------------------------------------------------------------------------|-------|
| 1   | Days to anthesis              | Anthesis     | The number of days from planting to the time when 50% of the plants have anther shedding pollen                                                                          | Count |
| 2   | Days to silking               | D.S.         | The number of days from planting to the time when 50% of the plants have emerged silk                                                                                    | Count |
| 3   | Anthesis silking interval     | ASI          | The interval in days between dates of silking and anthesis                                                                                                               | Count |
| 4   | Plant height                  | PLHT         | The distance from the base of the plant to the height of the first tassel branch                                                                                         | cm    |
| 5   | Ear aspect                    | EASP         | It is scored on a scale of 1-5 , where 1= clean, uniform , large and well-filled ears and 5 = rotten small partially filled ear                                          | Scale |
| 6   | Plant aspect                  | PASPUN       | It is scored on a scale of 1-9 , where 1= clean, uniform , large and well-filled ears and 9 = rotten small partially filled ear                                          | Scale |
| 7   | Ear per plant                 | EPP          | Total number of ears with at least one fully developed grain divided by the number of harvested plants                                                                   | Count |
| 8   | <i>Striga</i> emergence count | STRCO 1 & 2  | Number of emerged striga plant per plot at 8 and 10 weeks after planting [WAP]                                                                                           | Count |
| 9   | <i>Striga</i> damage rate     | STRRAT 1 & 2 | It is scored on a scale of 1-9 , where 1= no visible host plant damage symptom and 9 = all leaves are completely scorched and finally dead plants. Taken at 8 and 10 WAP | Scale |
| 10  | Grain yield                   | Yield/G.Y.   | Calculated from ear weight and grain moisture                                                                                                                            | kg    |

**Supplementary Table S2.** Mean squares from the combined ANOVA for traits recorded under infestation condition for 2years evaluated in 2 locations

| Source              | Df  | Plant height          | Ear Aspect        | Ear per plant     | Striga rate 8 WAP   | Striga rate 10 WAP  | Emerged Striga 8 WAP | Emerged Striga 10 WAP | Grain Yield [kg ha <sup>-1</sup> ] |
|---------------------|-----|-----------------------|-------------------|-------------------|---------------------|---------------------|----------------------|-----------------------|------------------------------------|
| <b>Geno</b>         | 149 | 1347.57 <sup>§</sup>  | 1.27 <sup>§</sup> | 0.25 <sup>§</sup> | 7.04 <sup>§</sup>   | 7.65 <sup>§</sup>   | 1529.72 <sup>§</sup> | 2433.63 <sup>§</sup>  | 3029370.5 <sup>§</sup>             |
| <b>Env</b>          | 3   | 24923.75 <sup>§</sup> | 7.35 <sup>§</sup> | 4.26 <sup>§</sup> | 174.40 <sup>§</sup> | 427.67 <sup>§</sup> | 5672.25 <sup>§</sup> | 39063.45 <sup>§</sup> | 55554413.3 <sup>§</sup>            |
| <b>Rep[Env]</b>     | 4   | 1542.45 <sup>§</sup>  | 1.18 <sup>§</sup> | 0.19 <sup>§</sup> | 1.08                | 2.86**              | 91.15                | 282.23                | 2934078.5 <sup>§</sup>             |
| <b>Blk[Rep*Env]</b> | 112 | 305.96 <sup>§</sup>   | 0.32 <sup>§</sup> | 0.06 <sup>§</sup> | 1.07 <sup>§</sup>   | 1.40 <sup>§</sup>   | 454.29 <sup>§</sup>  | 1117.56 <sup>§</sup>  | 685188.6 <sup>§</sup>              |
| <b>Geno*Env</b>     | 446 | 140.25***             | 0.29 <sup>§</sup> | 0.03              | 1.18 <sup>§</sup>   | 1.24 <sup>§</sup>   | 269.12***            | 531.70**              | 546418.6 <sup>§</sup>              |
| <b>Error</b>        | 483 | 106.25                | 0.18              | 0.03              | 0.63                | 0.72                | 202.1                | 421.76                | 356115                             |
| <b>CV[%]</b>        |     | 8.26                  | 14.22             | 22.25             | 19.62               | 14.35               | 60.95                | 58.84                 | 33.28                              |

\*Significant at  $p \leq 0.05$  level,

\*\*Significant at  $p \leq 0.01$  level,

\*\*\*Significant at  $p \leq 0.001$  level,

<sup>§</sup>Significant at  $p \leq 0.0001$  level respectively. Blk = Block, Env= Environment, Rep = Replication, CV = Coefficient of Variation, WAP = weeks after planting. ns = data not significant

**Supplementary Table S3.** Mean and standard errors of variables under *Striga* infestation and *Striga* non-infestation across the entire four environments

| <b>Variable</b>             | <b>Min</b> | <b>Max</b> | <b>Mean</b> | <b>Std error</b> | <b>Heritability</b> |
|-----------------------------|------------|------------|-------------|------------------|---------------------|
| Grain yield infested        | 13.00      | 3299       | <b>1580</b> | 270.5            | 0.83                |
| Plant height (cm)           | 89.25      | 151        | 124.75      | 4.25             | 0.90                |
| Ear per plant (number)      | 0.00       | 1.20       | 0.78        | 0.06             | 0.88                |
| Ear aspect (1-5)            | 2.00       | 4.75       | 3.00        | 0.19             | 0.78                |
| Striga damage rating 8 WAP  | 3.00       | 8.00       | 4.05        | 0.39             | 0.85                |
| Striga damage rating 10 WAP | 4.00       | 9.00       | 5.91        | 0.4              | 0.85                |
| Emerged Striga count 8 WAP  | 1.00       | 73.00      | 23.31       | 5.85             | 0.85                |
| Emerged Striga count 10 WAP | 3.00       | 88.00      | 34.88       | 8.29             | 0.8                 |

**WAP=weeks after planting**

**Supplementary Figure S1:** Graph [A] Bayesian information criterion versus the number of clusters and [B] cross-validation error versus K value

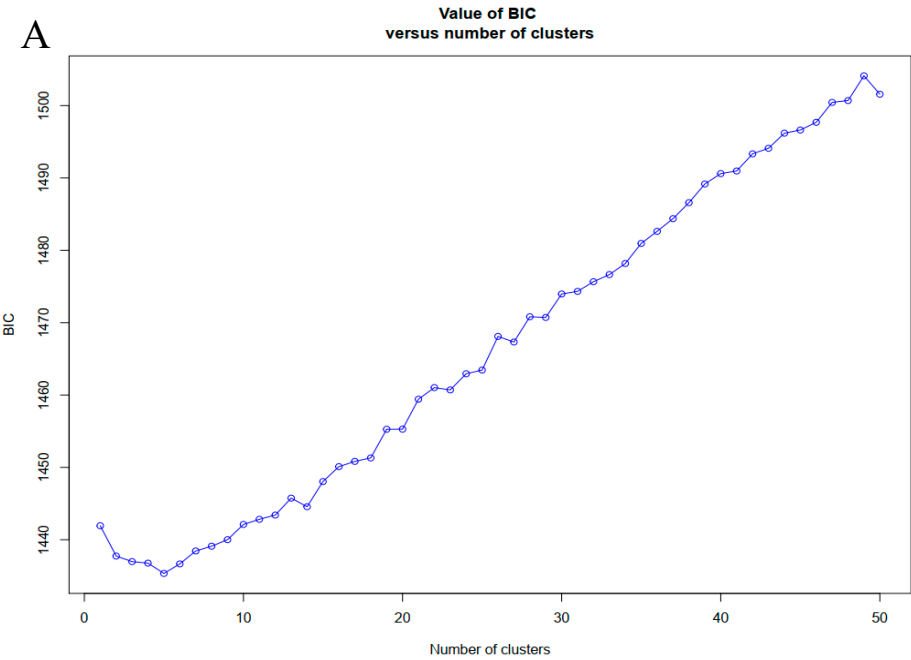

**B**

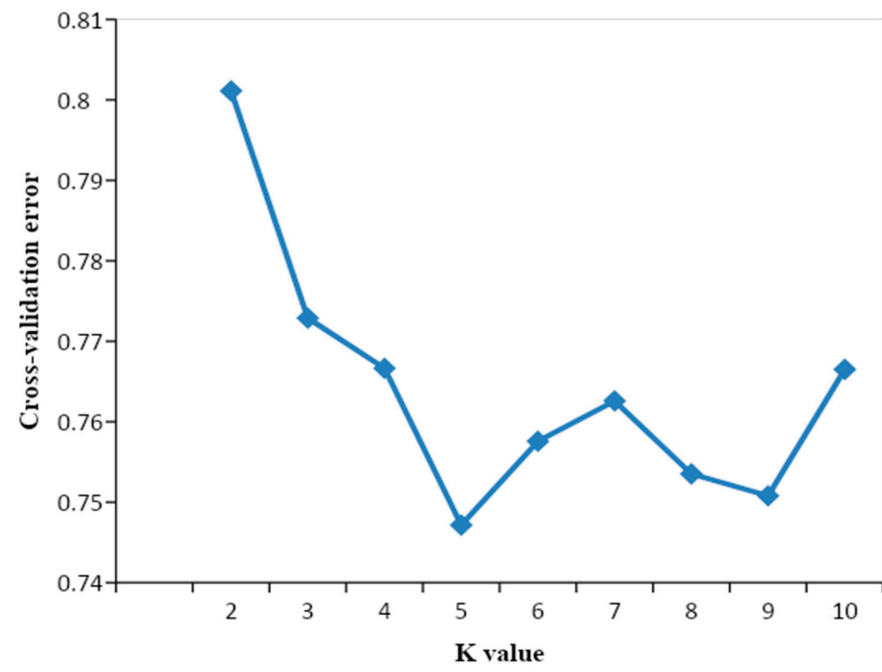

**Supplementary Table S4.** Grouping of the 150 inbred lines using 16,735 SNPs

| <b>Groups</b> | <b>Inbred lines</b> | <b>Grain color</b> | <b>Source population</b> |
|---------------|---------------------|--------------------|--------------------------|
| 1             | 22                  | White              | ZDIP                     |
| 2             | 27                  | White              | IWDS                     |
| 3             | 8                   | White              | TZEC                     |
| 4             | 54                  | White and Yellow   | Mixed                    |
| 5             | 39                  | White and Yellow   | TZLC                     |

**Supplementary Fig S2:** Mantel correlation test performed between the different dissimilarity matrices alongside the combined matrix. Sim = similarity coefficient, beacon = Mantel threshold indicating the correlation.

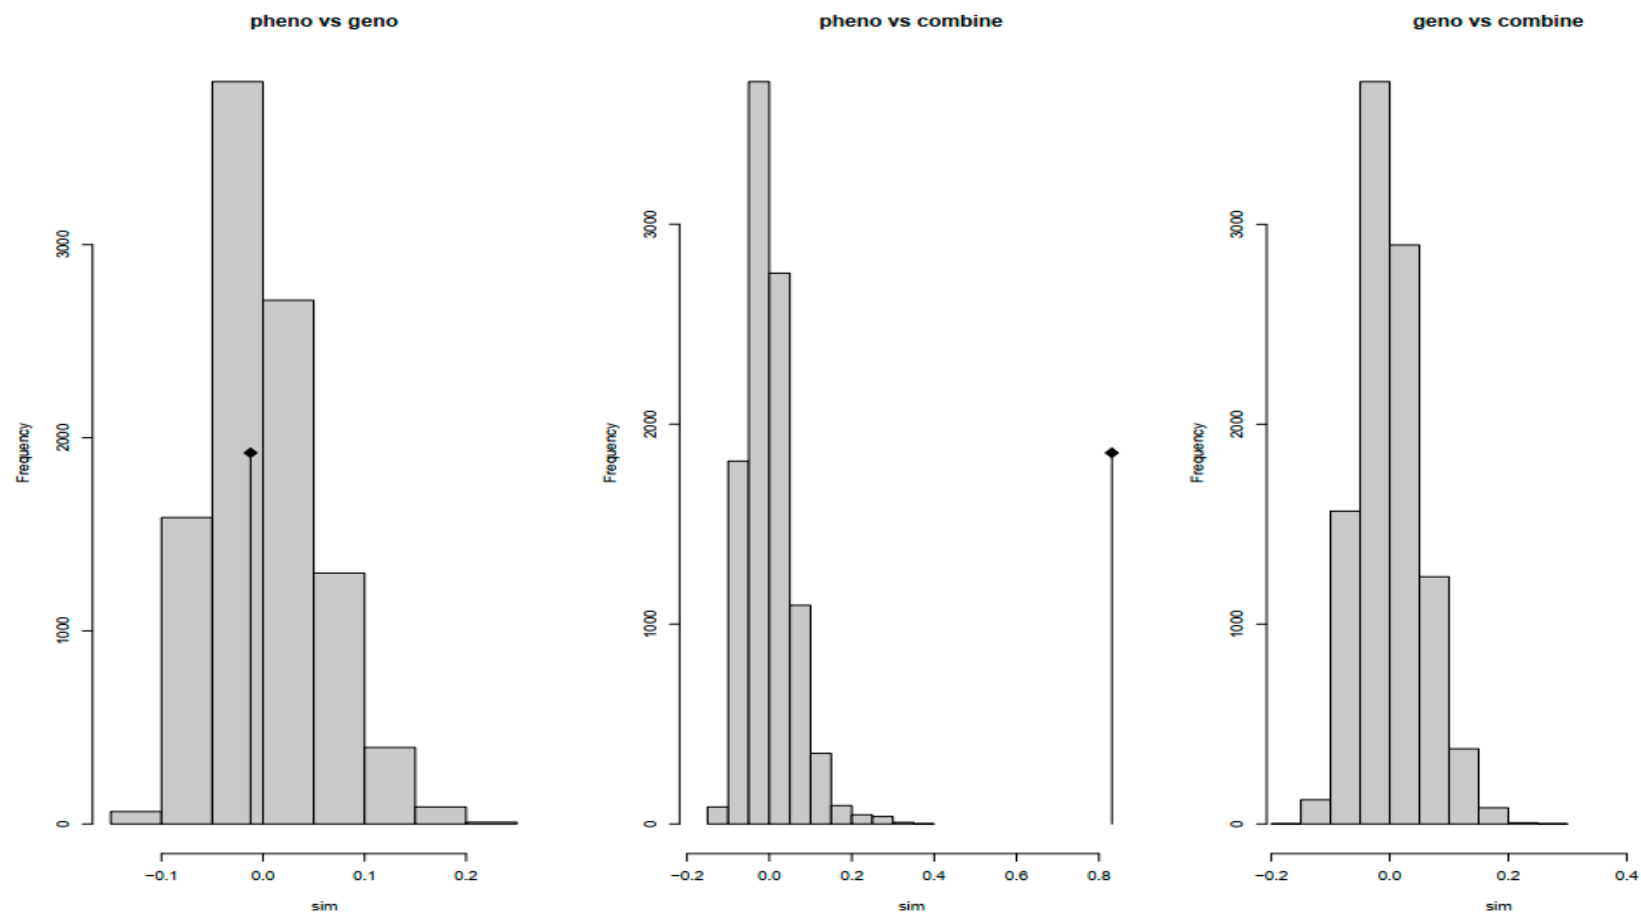

Supplement: s1 [file s1]
